# Supplementary material
Source: PubMed Central journal article supplement (PMC5754241)
Supplement: NIHMS915920-supplement-1.pdf [file NIHMS915920-supplement-1.pdf]

# **Evidences for KSHV-induced Mesenchymal-to-Endothelial Transition Transforming Oral Mesenchymal Stem Cell to Kaposi's Sarcoma**

## **Supplementary Data**

Fig. S1. Infectivity of KSHV in PDLSCs, GMSCs and DPSCs.

Fig. S2. Persistent KSHV infection in PDLSCs.

Fig. S3. Long-term cultured KSHV-infected PDLSCs preserve the potential of tubulogenesis and invasiveness.

Fig. S4. Expression of oral MSC-specific and endothelial markers in mock- and KSHV-infected MSCs in mouse kidney capsule implant.

Fig. S5. Gene expression profiling analysis of KSHV-infected oral MSCs.

Fig. S6. Top 20 significantly enriched Gene Ontology (GO) categories of molecular function and biological process in KSHV-infected PDLSC.

Fig. S7. Recalculation of the average linkage distance between KS and each cell group from published data.

Fig. S8. Relationship of KSHV-infected MSC and an MEndT model (induced hAMSC) in gene expression profile.

Table S1. Common DEGs in KSHV-PDLSC vs. PDLSC and KS signature

Table S2. Consistently regulated genes between KSHV-PDLSC vs. PDLSC and MEndT hAMSC vs. hAMSC.

Table S3. Common DEGs in KSHV-HDMEC vs. HDMEC and KS signature.

Table S4. Common DEGs in KSHV-HMVEC vs. HMVEC and KS signature.

Table S5. Common DEGs in KSHV-LEC vs. LEC and KS signature.

Table S6. Common DEGs in KSHV-BEC vs. BEC and KS signature.

**A**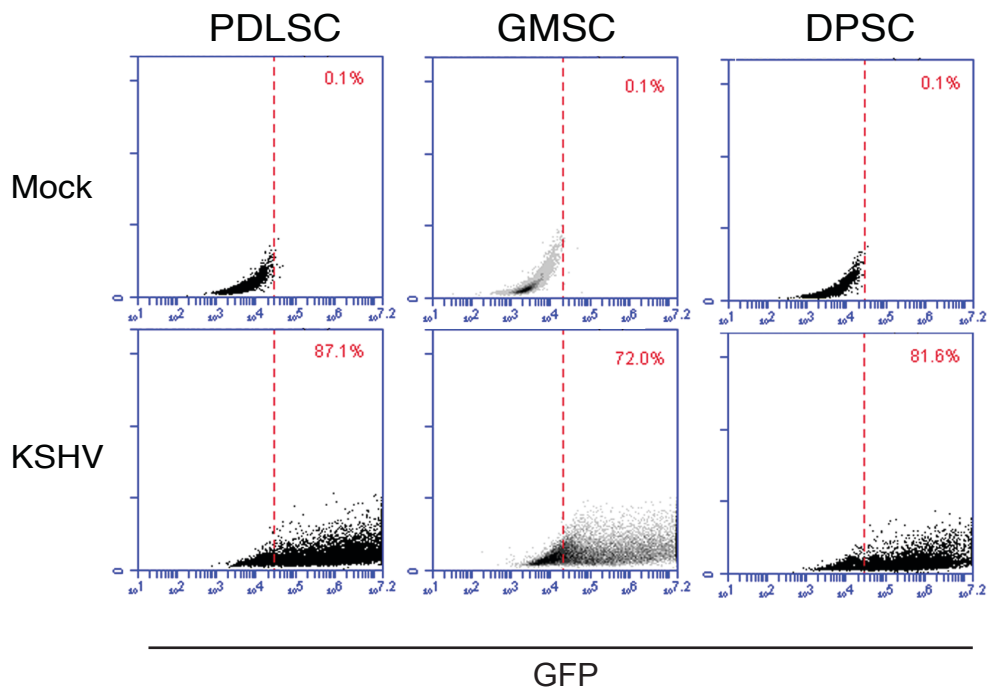**B**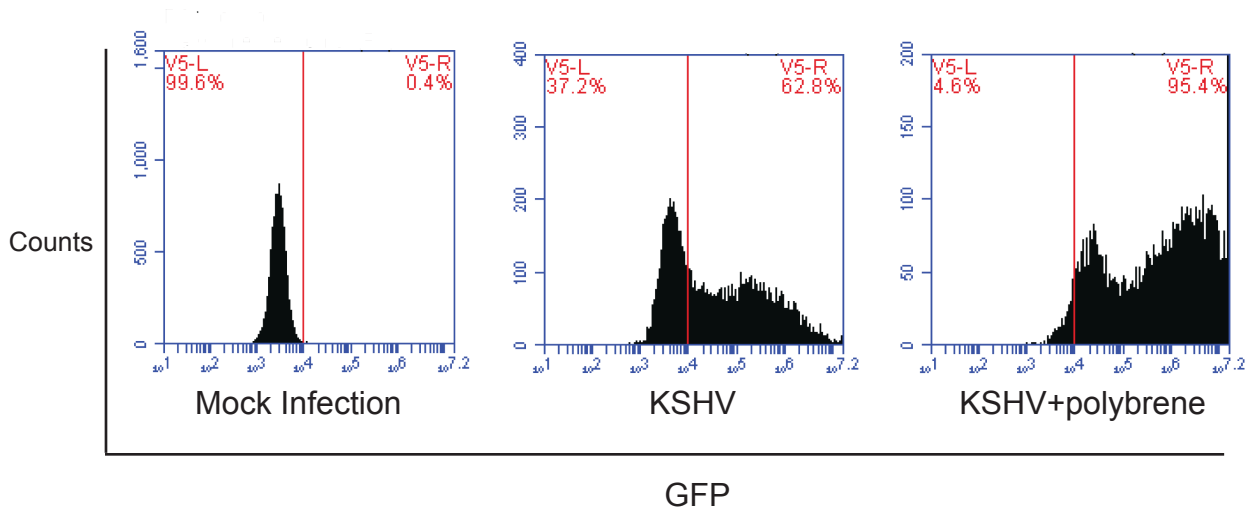

Fig. S1. (A) Primary oral MSCs of different origins (PDLSCs, GMSCs and DPSCs) were infected with GFP-KSHV in an MOI of 50 (KSHV genome equivalent) in the presence of polybrene for 48 hours and analyzed by GFP fluorescence. The rates of KSHV infection were determined by flow cytometric analysis of GFP-expression cells. (B) Comparison of infectivity of KSHV to PDLSCs in the presence and absence of polybrene.

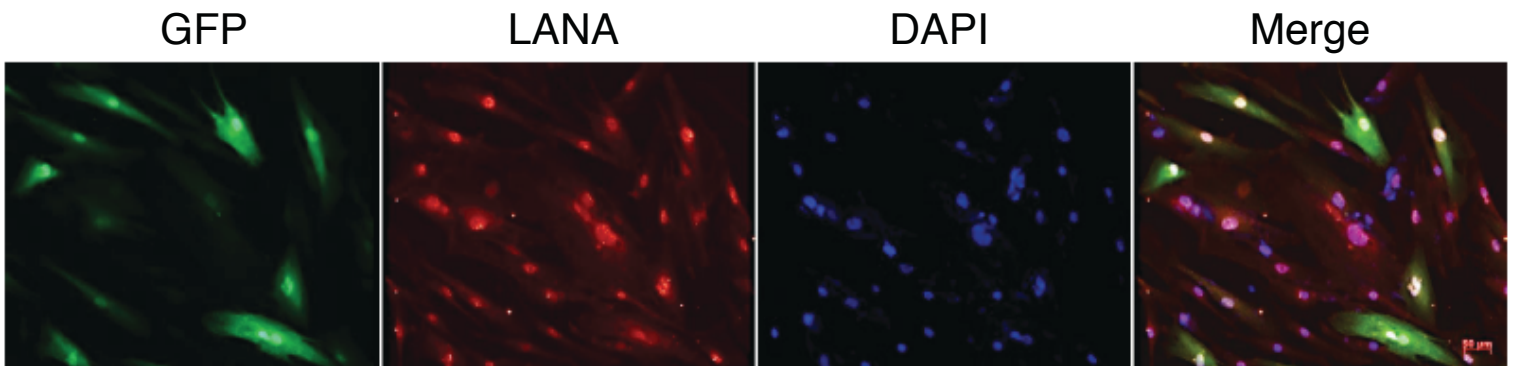

Fig. S2. Persistent KSHV infection in PDLSCs. Primary PDLSCs were infected with GFP-KSHV in an MOI of 50 (KSHV genome equivalent). Cells were cultured for four weeks with out any antibiotics selection. Cells were analyzed by GFP fluoresce and IFA with an anti-LANA antibody.

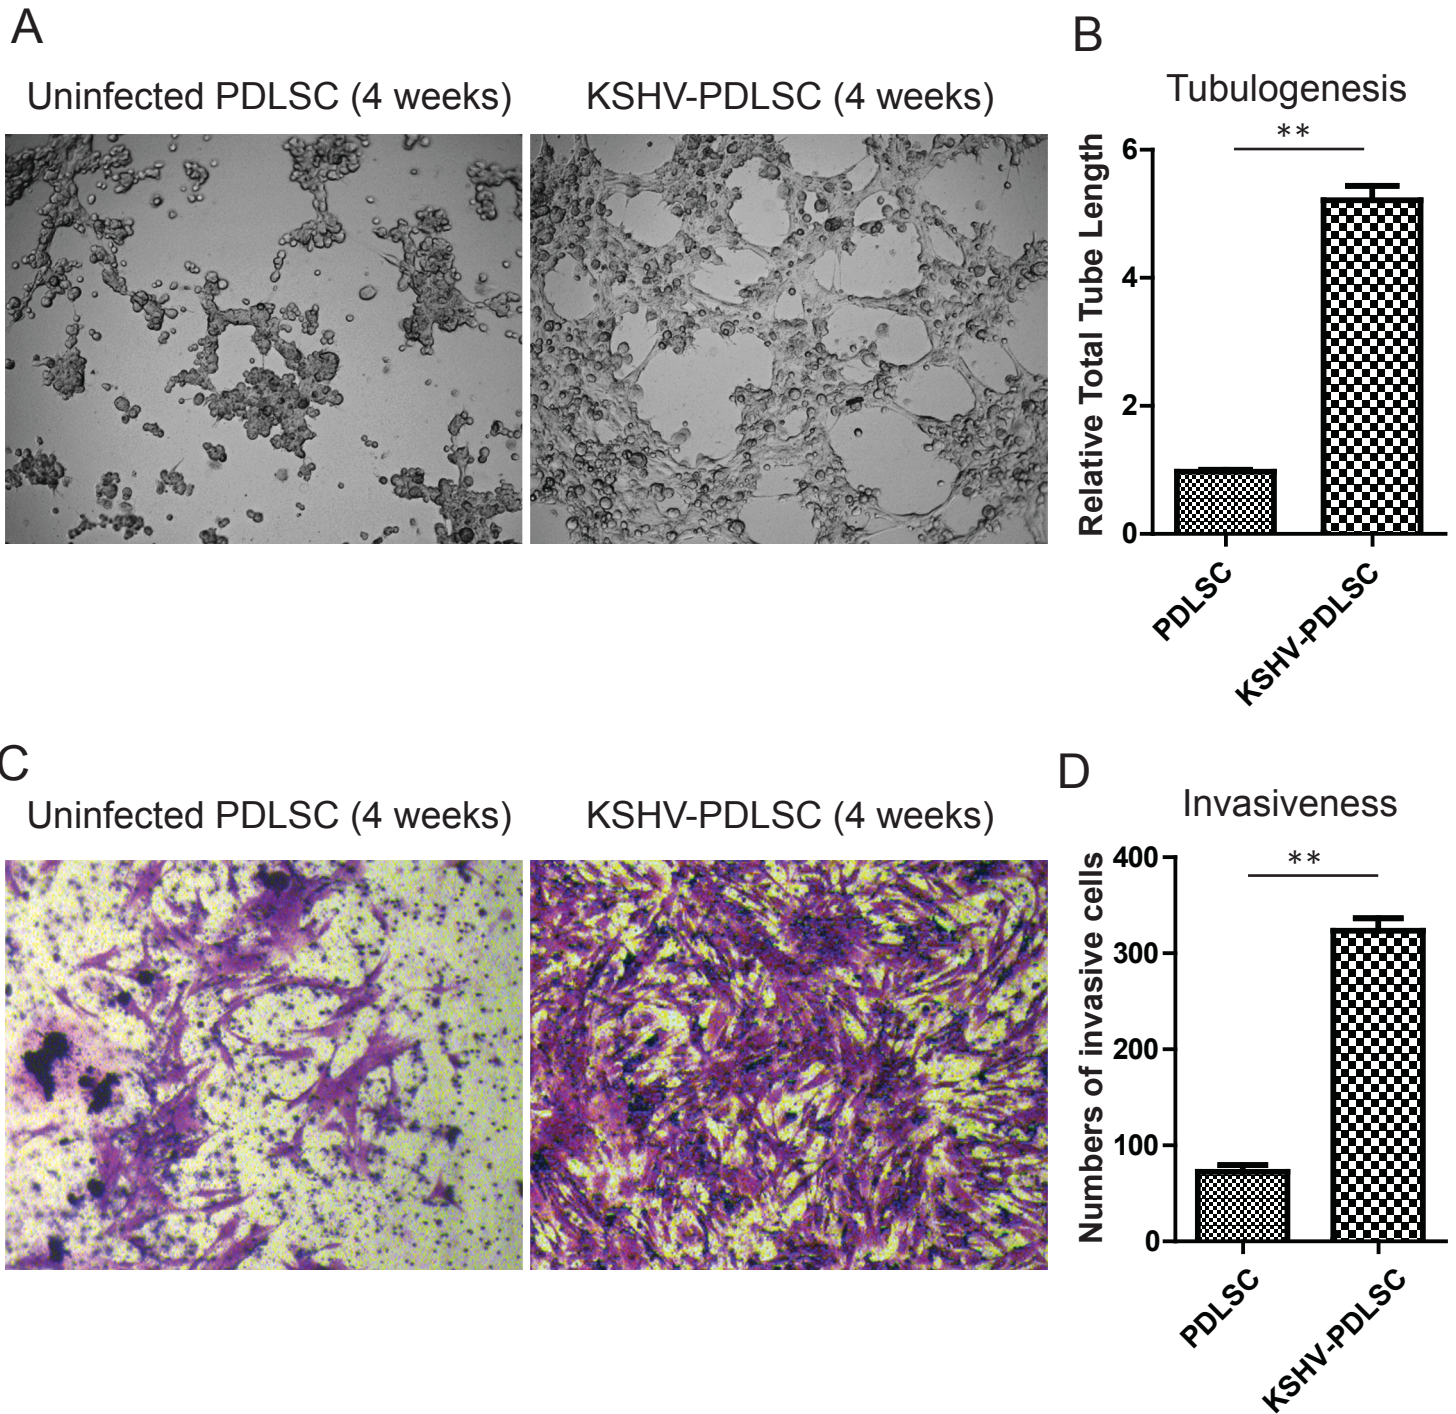

**Fig. S3. Long-term cultured KSHV-infected PDLSCs preserve the potential of tubulogenesis and invasiveness.** Primary PDLSCs were infected with GFP-KSHV in an MOI of 50 (KSHV genome equivalent). Cells were cultured without any antibiotics selection in cytokine-free medium for four weeks. Mock- and virally infected PDLSCs were loaded on the top of Matrigel and the ability of the cells in formation of capillary-like tubules was analyzed under a microscope (A). Quantification of tubulogenesis was performed by calculating the average length of the capillary-like tubules (B). Cells were subjected to Transwell migration assay to assess cell invasion ability. PDLSCs or KSHV-PDLSCs were seeded in the upper chamber of Transwell in serum-free MEM. MEM containing 10% FBS was used as a stimulus for chemotaxis in the lower chamber. Cells migrated to the lower chamber were stained with crystal violet (C). Quantification of invasiveness was performed by counting the invasive cell numbers from 5 different fields (D).

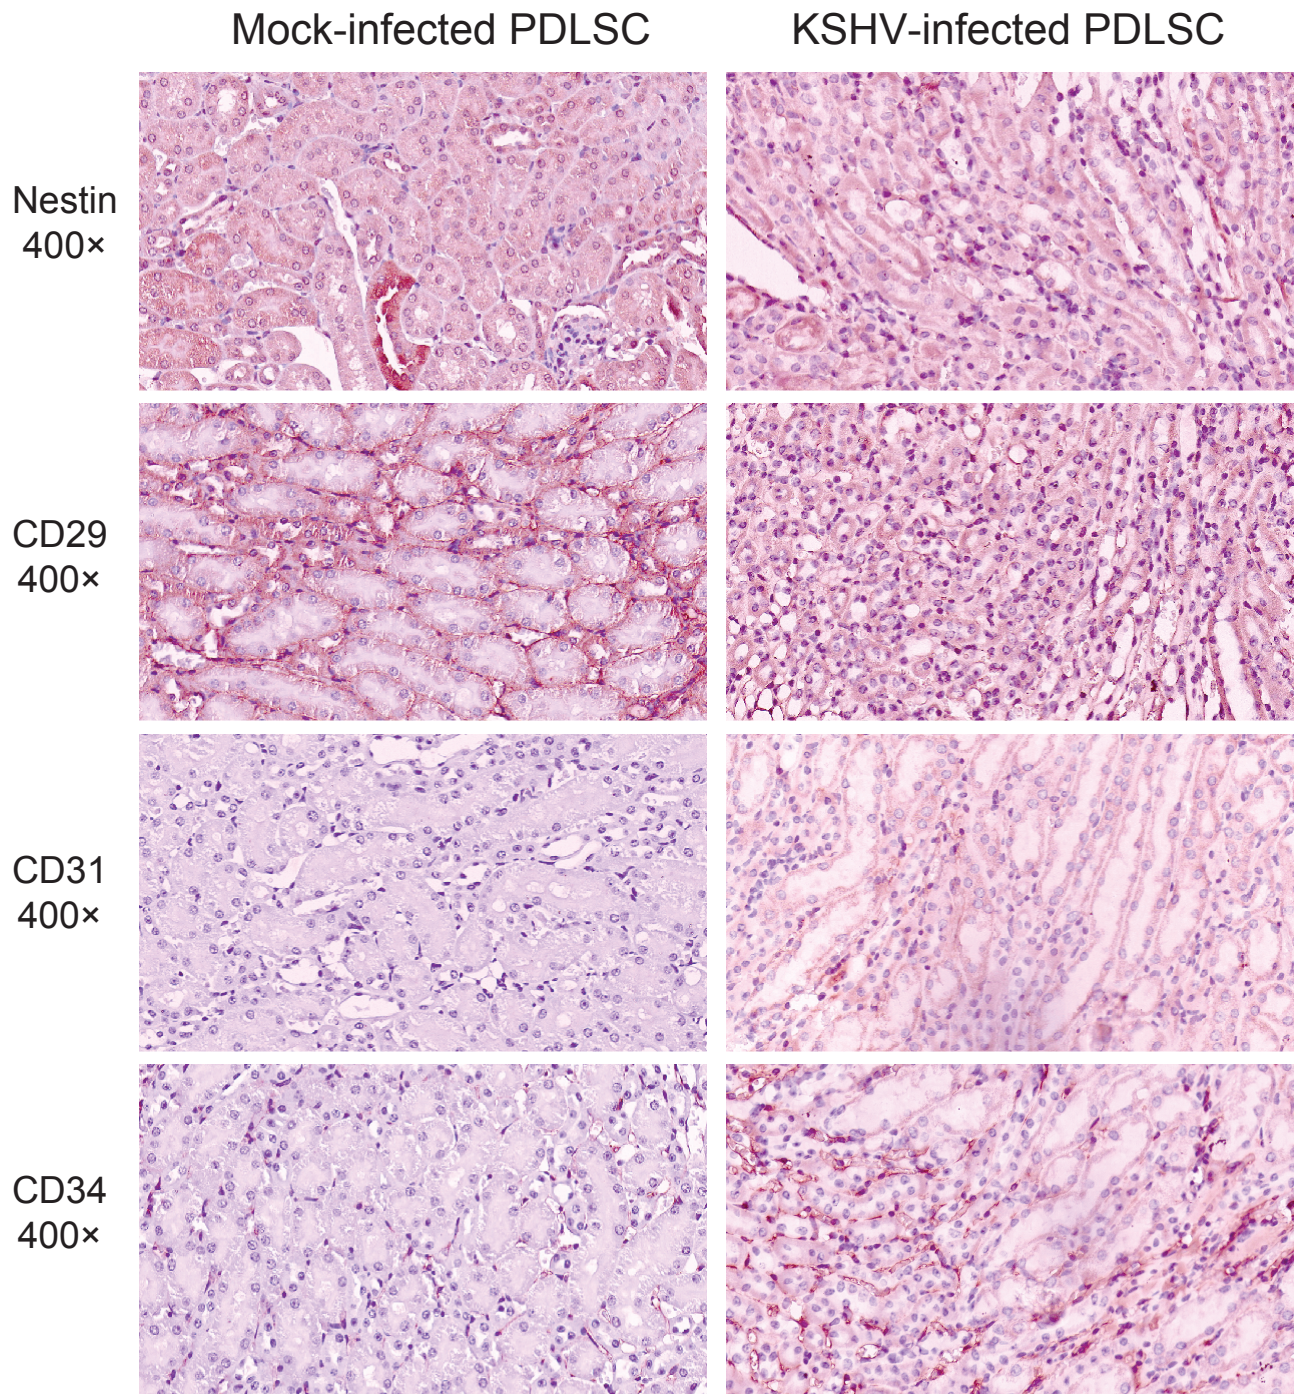

**Fig. S4. Expression of oral MSC-specific and endothelial markers in mock- and KSHV-infected MSCs.** Sections of kidney capsule implantation of mock- and KSHV-infected PDLSCs were subjected to immunohistochemical analyses with antibodies against neural crest-derived stem marker Nestin, oral MSC marker CD29, endothelial marker CD31 and hematopoietic/endothelial progenitor marker CD34.

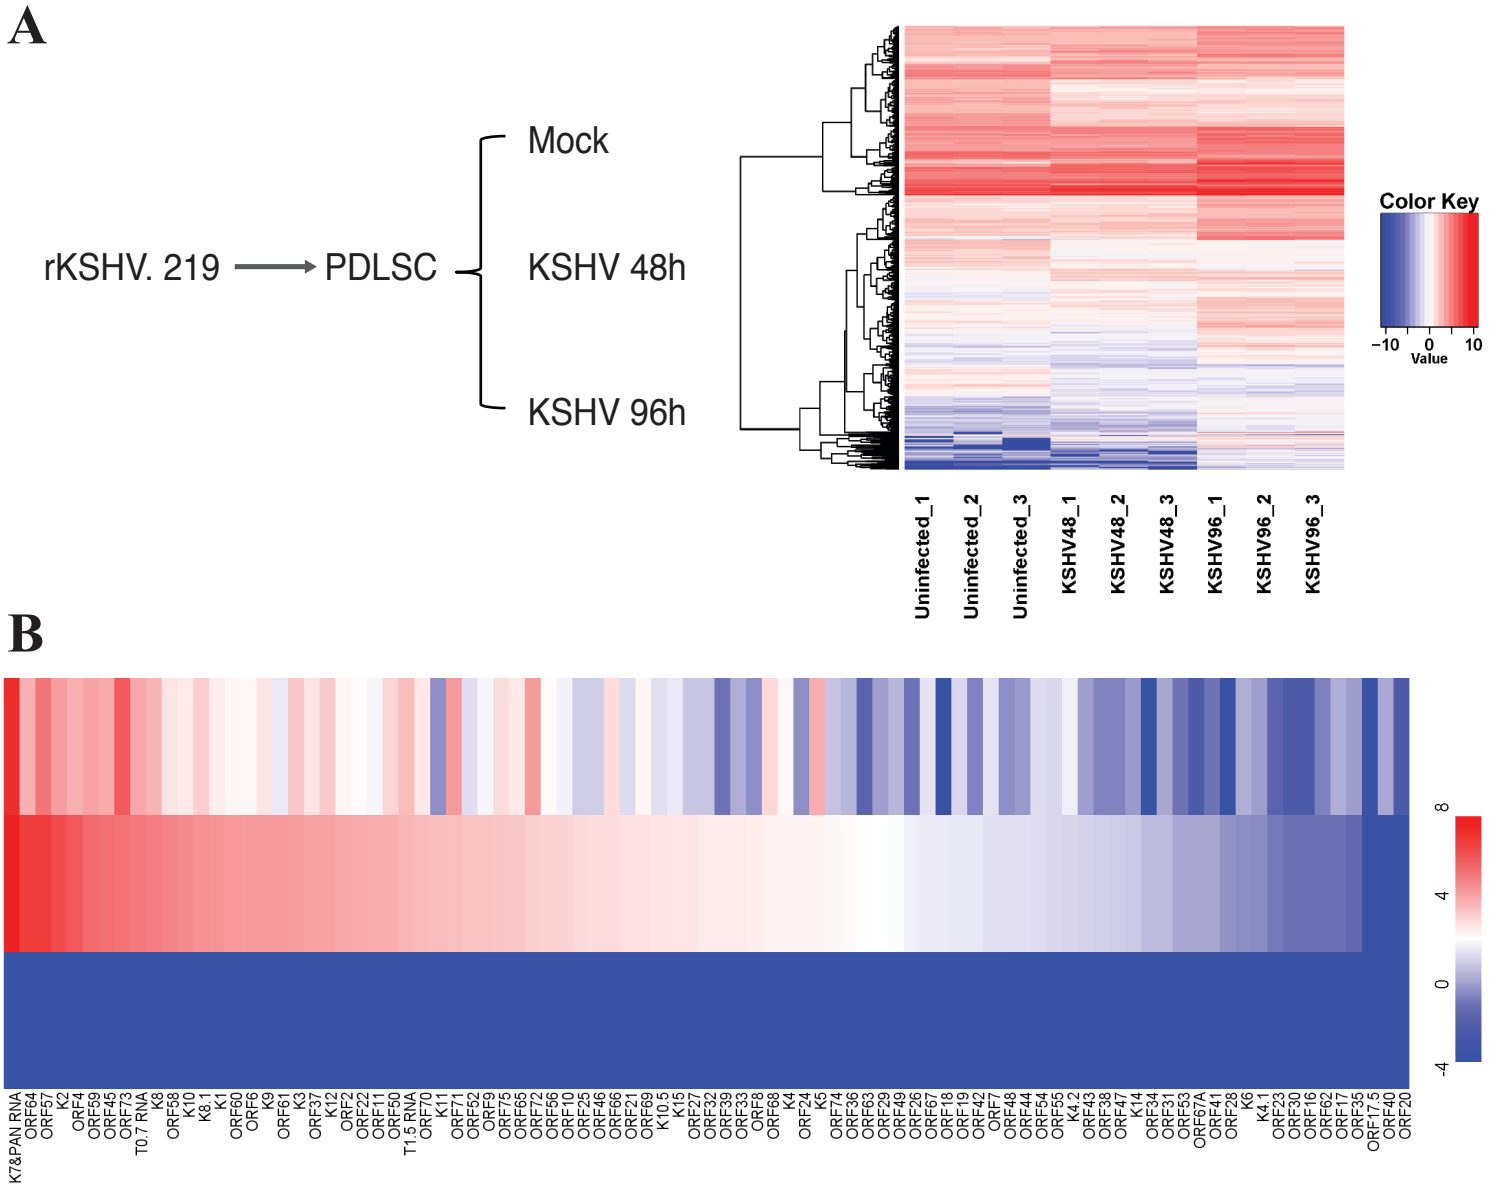

**Fig. S5. Gene expression profiling analysis of KSHV-infected oral MSCs.** PDLSCs (p2) were infected with rKSHV.219 in an MOI of 50 (viral genomic DNA equivalent). RNA was isolated from mock- and KSHV-infected PDLSCs (48 or 96 hour post-infection) and subjected to RNA-seq analysis. Clean reads were mapped to human reference genome (version hg19/GRCh37) and KSHV reference genome (version CQ994935.1). Differentially expressed cellular (A) and viral genes (B) were shown in heatmap.

A

### GO Enrichment of Molecular Function for PDLSC DEG

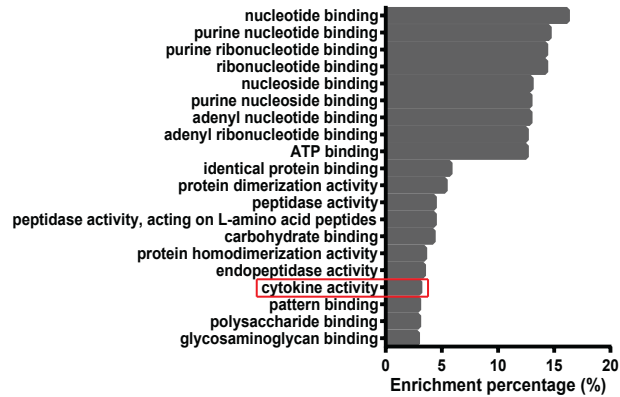

B

### GO Enrichment of Molecular Function for HDMEC DEG

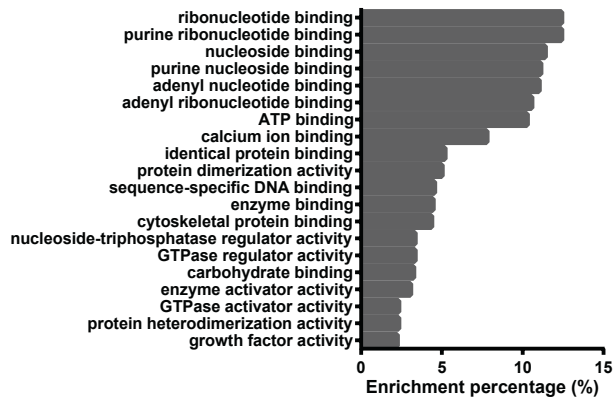

C

### GO Enrichment of Molecular Function for HMVEC DEG

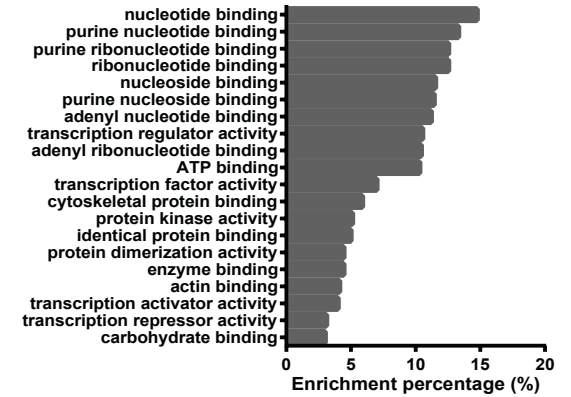

D

### GO Enrichment of Biological Process for PDLSC DEG

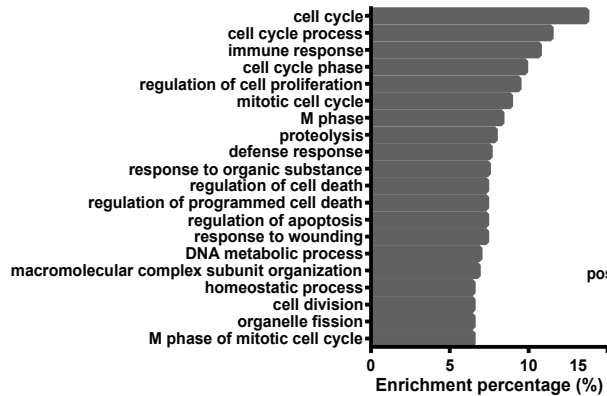

E

### GO Enrichment of Biological Process for HDMEC DEG

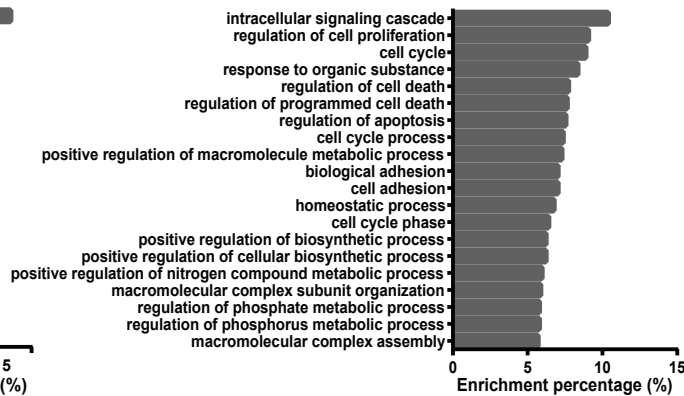

F

### GO Enrichment of Biological Process for HMVEC DEG

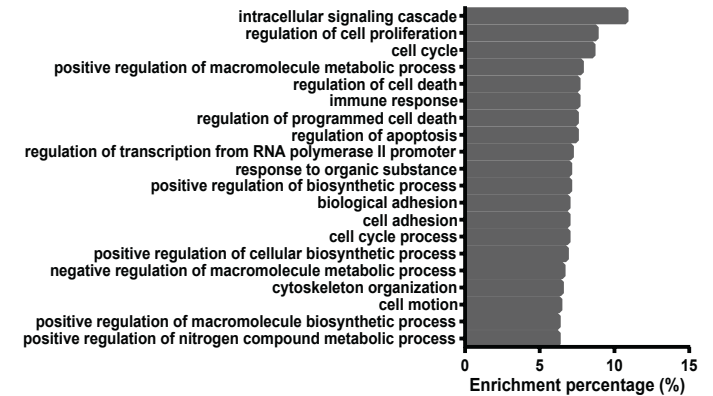

G

### GO Enrichment of Biological Process for 80 consistent DEGs between PDLSC and KS

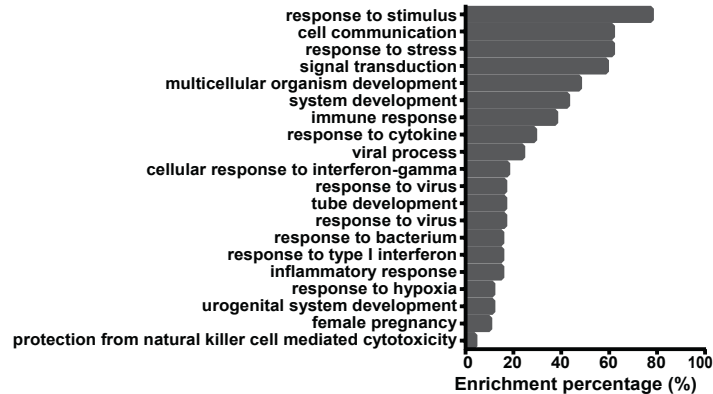

H

### GO Enrichment of Biological Process for 134 consistent DEGs between EC and KS

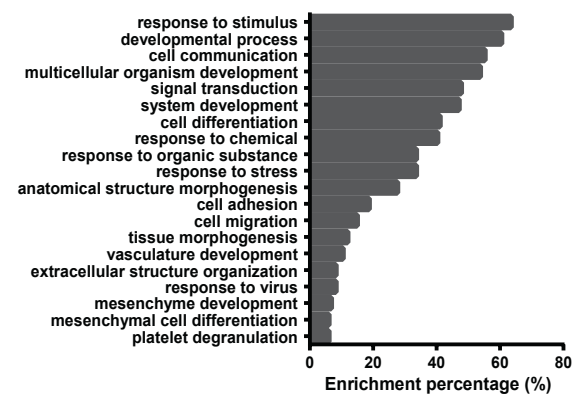

Fig. S6. Top 20 significantly enriched Gene Ontology (GO) categories of molecular function and biological process in KSHV-infected PDLSC (A, D), HDMEC (B, E) and HMVEC (C, F), as well as biological process in consistent DEGs of KS and PDLSC or endothelial cells (G, H).

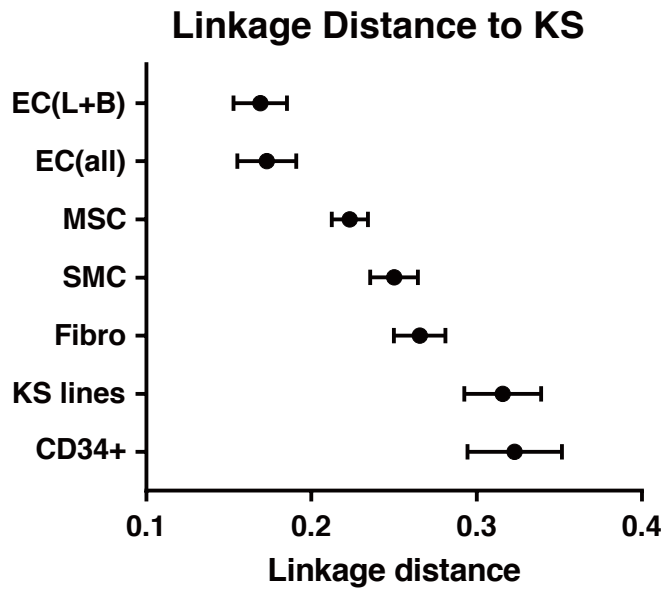

Fig. S7. The average linkage distance between Kaposi's sarcoma (KS) and each cell group was re-calculated from the published data (52) by Pearson correlation coefficient and then subtracted by 1. EC (L+B): endothelial cells (LECs+BECs).



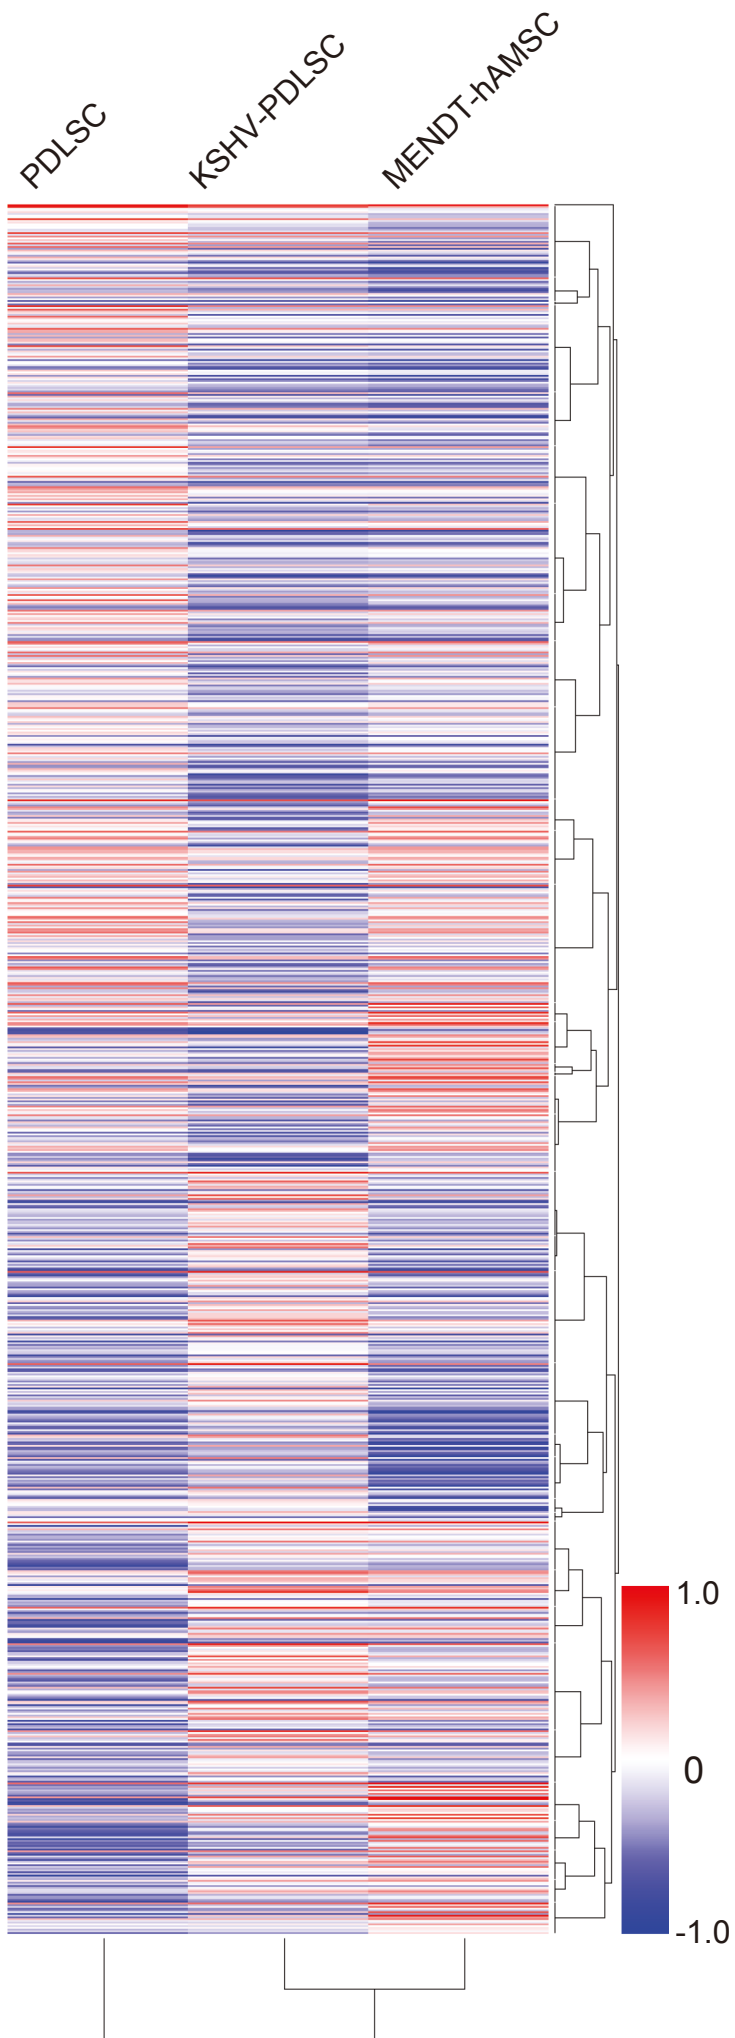

**Fig. S8. Relationship of KSHV-infected MSC and an MENDT model (induced hAMSC) in gene expression profile.** Mock- and KSHV-infected PDLSCs were normalized and subjected to a comparison with hAMSCs that have been induced for endothelial differentiation. Unsupervised clustering of samples (X-axis) and genes (Y-axis) were performed by average linkage method.

Table S1. Common DEGs in KSHV-PDLSC vs. PDLSC and KS signature

| Function Cluster                                 |                                    | Gene symbol | KSHV-<br>MSC vs.<br>MSC | KS vs.<br>skin | KSHV-<br>HDMEC vs.<br>HDMEC | KSHV-<br>HMVEC vs.<br>HMVEC | KSHV-<br>LEC vs.<br>LEC | KSHV-<br>BEC vs.<br>BEC |
|--------------------------------------------------|------------------------------------|-------------|-------------------------|----------------|-----------------------------|-----------------------------|-------------------------|-------------------------|
| <b>Mesenchymal to<br/>Endothelial Transition</b> |                                    | BGN         | ↓↓                      | ↑↑             | —                           | ↓                           | ↓↓                      | ↓                       |
|                                                  |                                    | DSP         | ↑↑                      | ↓↓             | —                           | ↓                           | ↓↓                      | —                       |
|                                                  |                                    | EDNRA       | ↑↑                      | ↑↑             | —                           | —                           | ↓                       | —                       |
|                                                  |                                    | FGF2        | ↑                       | ↑↑             | —                           | —                           | —                       | ↓↓                      |
|                                                  |                                    | MMP11       | ↑                       | ↑↑             | —                           | —                           | ↓                       | ↑                       |
|                                                  |                                    | PDPN        | ↑↑                      | ↑↑             | ↓↓                          | ↑↑                          | ↑                       | ↑                       |
|                                                  |                                    | PROX1       | ↑↑                      | ↑↑             | ↑                           | ↓                           | ↓↓                      | ↑                       |
|                                                  |                                    | PGF         | ↑↑                      | ↑↑             | ↓                           | ↑                           | ↓                       | —                       |
|                                                  |                                    | PML         | ↑↑                      | ↑↑             | —                           | —                           | ↓                       | —                       |
|                                                  |                                    | TGFB3       | ↑↑                      | ↑↑             | —                           | —                           | —                       | —                       |
|                                                  |                                    | TGFBR2      | ↑↑                      | ↑↑             | —                           | —                           | ↓                       | —                       |
| <b>Vessel development</b>                        |                                    | ANGPTL2     | ↑↑                      | ↑↑             | —                           | ↑                           | ↓                       | ↑↑                      |
|                                                  |                                    | VCAM1       | ↑↑                      | ↑↑             | —                           | —                           | —                       | ↓                       |
|                                                  |                                    | WARS        | ↑↑                      | ↑↑             | ↑                           | —                           | ↓                       | —                       |
| <b>Immune response</b>                           | <b>Chemotaxis</b>                  | CCL5        | ↑↑                      | ↑↑             | —                           | —                           | ↑                       | ↑↑                      |
|                                                  |                                    | CCL8        | ↑↑                      | ↑↑             | —                           | —                           | ↑                       | —                       |
|                                                  |                                    | CXCL10      | ↑↑                      | ↑↑             | —                           | ↑↑                          | —                       | —                       |
|                                                  |                                    | SHC3        | ↑↑                      | ↓↓             | —                           | —                           | —                       | —                       |
|                                                  |                                    | STAT1       | ↑↑                      | ↑↑             | ↑↑                          | —                           | —                       | —                       |
|                                                  | <b>Inflammation</b>                | APOL2       | ↑↑                      | ↑↑             | —                           | —                           | ↓                       | —                       |
|                                                  |                                    | APOL3       | ↑↑                      | ↑↑             | —                           | —                           | —                       | ↓                       |
|                                                  |                                    | CFH         | ↑↑                      | ↑↑             | —                           | —                           | —                       | —                       |
|                                                  |                                    | FN1         | ↑↑                      | ↑↑             | —                           | ↓↓                          | ↓↓                      | ↓                       |
|                                                  |                                    | IFI16       | ↑↑                      | ↑↑             | —                           | ↑↑                          | ↑                       | —                       |
|                                                  |                                    | IL-1RN      | ↑↑                      | ↓↓             | —                           | —                           | —                       | —                       |
|                                                  |                                    | LY96        | ↑↑                      | ↑↑             | —                           | —                           | —                       | ↑                       |
|                                                  |                                    | NT5E        | ↑↑                      | ↑↑             | ↓                           | ↑                           | ↓                       | —                       |
|                                                  | PLA2G4C                            | ↑↑          | ↑↑                      | —              | —                           | —                           | —                       |                         |
|                                                  | <b>Other genes<br/>involved in</b> | FCGRT       | ↑↑                      | ↑↑             | —                           | —                           | —                       | —                       |
| GBP1                                             |                                    | ↑↑          | ↑↑                      | ↑↑             | ↑↑                          | —                           | ↓↓                      |                         |
| GCH1                                             |                                    | ↑↑          | ↑↑                      | —              | ↑                           | ↑↑                          | —                       |                         |

|                            |         |    |    |    |    |    |    |
|----------------------------|---------|----|----|----|----|----|----|
| <b>immune response</b>     | HLA-A   | ↑↑ | ↑↑ | —  | —  | —  | —  |
|                            | HLA-B   | ↑↑ | ↑↑ | ↑  | ↑  | —  | —  |
|                            | HLA-C   | ↑↑ | ↑↑ | ↑  | ↑  | —  | —  |
|                            | HLA-E   | ↑↑ | ↑↑ | —  | —  | —  | —  |
|                            | HLA-F   | ↑↑ | ↑↑ | —  | —  | —  | —  |
|                            | HLA-G   | ↑↑ | ↑↑ | —  | —  | —  | —  |
|                            | IFI35   | ↑↑ | ↑↑ | —  | ↑↑ | —  | —  |
|                            | IFITM1  | ↑↑ | ↑↑ | —  | ↑↑ | ↑  | —  |
|                            | IFITM3  | ↑↑ | ↑↑ | —  | —  | —  | —  |
|                            | ISG15   | ↑↑ | ↑↑ | —  | ↑↑ | ↑↑ | ↑  |
|                            | ISG20   | ↑↑ | ↑↑ | —  | —  | —  | ↓↓ |
|                            | NOD2    | ↑↑ | ↓↓ | ↑↑ | —  | —  | —  |
|                            | PSMB9   | ↑↑ | ↑↑ | ↑  | ↑↑ | ↑  | ↑  |
|                            | SP110   | ↑↑ | ↑↑ | —  | ↑↑ | —  | ↓  |
|                            | SPON2   | ↑↑ | ↑↑ | —  | —  | —  | —  |
|                            | TACC3   | ↓↓ | ↑↑ | ↓  | ↓  | —  | ↓↓ |
|                            | TIMP1   | ↑↑ | ↑↑ | —  | —  | ↑↑ | ↑↑ |
|                            | TNFSF10 | ↑↑ | ↑↑ | ↑↑ | —  | ↓↓ | —  |
|                            | TRIM25  | ↑↑ | ↓↓ | —  | —  | —  | —  |
|                            | TRIM38  | ↑↑ | ↑↑ | —  | ↑  | ↑  | ↑  |
| <b>Cell proliferation</b>  | CCND1   | ↑↑ | ↓↓ | —  | —  | ↑↑ | ↑↑ |
|                            | DHCR24  | ↓↓ | ↓↓ | —  | —  | —  | —  |
|                            | IGF1    | ↑↑ | ↑↑ | —  | —  | ↓↓ | —  |
|                            | KLF4    | ↑↑ | ↓↓ | ↓↓ | ↓  | ↓  | —  |
|                            | MCM5    | ↓↓ | ↑↑ | ↓  | —  | ↓  | ↓  |
|                            | MCM6    | ↓↓ | ↑↑ | ↓  | —  | ↓  | ↓  |
|                            | TOB1    | ↑↑ | ↓↓ | —  | —  | ↓↓ | ↑  |
| <b>Signal Transduction</b> | CD36    | ↑↑ | ↑↑ | ↑↑ | ↓  | ↓↓ | ↑  |
|                            | DAPK2   | ↑↑ | ↓↓ | —  | —  | ↓  | —  |
|                            | DUSP6   | ↑↑ | ↑↑ | —  | —  | ↓  | ↓  |
|                            | FAM129A | ↓↓ | ↑↑ | —  | —  | ↓  | —  |
|                            | GDF5    | ↑↑ | ↓↓ | —  | —  | ↓↓ | —  |
|                            | GPSM2   | ↓↓ | ↓↓ | ↓↓ | ↓  | —  | —  |
|                            | LGALS9  | ↑↑ | ↑↑ | —  | ↑↑ | ↓  | —  |
|                            | RGS2    | ↑↑ | ↓↓ | —  | —  | —  | —  |

|                   |                      |         |    |    |    |    |    |
|-------------------|----------------------|---------|----|----|----|----|----|
|                   | SRGAP3               | ↑↑      | ↓↓ | —  | —  | —  | —  |
|                   | TBC1D1               | ↓↓      | ↑↑ | —  | —  | —  | —  |
| <b>Metabolism</b> | BACE2                | ↑↑      | ↑↑ | —  | —  | ↓  | —  |
|                   | EHF                  | ↑↑      | ↓↓ | ↑  | —  | —  | —  |
|                   | KLHL3                | ↑↑      | ↑↑ | —  | —  | ↓  | —  |
|                   | PBXIP1               | ↑↑      | ↑↑ | —  | —  | ↓  | ↑↑ |
|                   | TIMP3                | ↑↑      | ↑↑ | ↑↑ | —  | ↓↓ | —  |
|                   | UBE2L6               | ↑↑      | ↑↑ | —  | ↑↑ | ↓  | —  |
|                   | UBE2S                | ↓↓      | ↑↑ | ↓  | ↓  | —  | ↓  |
|                   | <b>Cell adhesion</b> | C1ORF38 | ↑↑ | ↑↑ | —  | —  | ↑  |
| CLCA2             |                      | ↑↑      | ↓↓ | ↓↓ | —  | ↑  | ↑  |
| PCDH17            |                      | ↑↑      | ↑↑ | ↑  | ↑↑ | ↓  | —  |
| PODXL             |                      | ↑↑      | ↑↑ | ↓  | ↑  | ↑↑ | ↑↑ |
| <b>Others</b>     | ADD3                 | ↑↑      | ↑↑ | ↑  | —  | ↓↓ | —  |
|                   | AKAP12               | ↑↑      | ↑↑ | —  | ↑  | ↓  | —  |
|                   | AKR1B1               | ↑↑      | ↑↑ | ↓↓ | —  | —  | —  |
|                   | ALDH3A1              | ↑↑      | ↓↓ | —  | —  | ↑  | ↑↑ |
|                   | AVPI1                | ↑↑      | ↓↓ | —  | —  | —  | —  |
|                   | BTN3A3               | ↑↑      | ↑↑ | —  | —  | ↓  | —  |
|                   | ChGn                 | ↑↑      | ↑↑ | —  | —  | ↓  | —  |
|                   | COTL1                | ↓↓      | ↑↑ | —  | —  | ↓↓ | ↓  |
|                   | CPA4                 | ↓↓      | ↓↓ | —  | —  | ↓↓ | —  |
|                   | CYP2E1               | ↑↑      | ↓↓ | —  | —  | —  | —  |
|                   | DTNA                 | ↑↑      | ↓↓ | —  | —  | ↓↓ | —  |
|                   | DTYMK                | ↓↓      | ↑↑ | ↓  | —  | —  | —  |
|                   | EPS8L2               | ↑↑      | ↓↓ | —  | —  | ↓↓ | —  |
|                   | GABBR2               | ↑↑      | ↑↑ | ↓↓ | ↓  | ↓  | ↓  |
|                   | GCAT                 | ↓↓      | ↓↓ | —  | —  | ↑  | ↑  |
|                   | GOLM1                | ↑↑      | ↑↑ | —  | —  | ↑↑ | —  |
|                   | HSPA4L               | ↑↑      | ↓↓ | —  | ↑↑ | —  | —  |
|                   | KCTD12               | ↑↑      | ↑↑ | —  | ↓  | ↓↓ | ↓  |
|                   | KPNA2                | ↓↓      | ↑↑ | —  | —  | —  | ↓  |
|                   | KRT10                | ↓↓      | ↓↓ | —  | —  | ↑  | —  |
| LAP3              | ↑↑                   | ↑↑      | —  | ↑  | ↓  | —  |    |
| LGMN              | ↑↑                   | ↑↑      | —  | —  | ↓  | ↑  |    |

|         |    |    |    |    |    |    |
|---------|----|----|----|----|----|----|
| MDK     | ↑↑ | ↑↑ | -  | -  | ↓  | -  |
| OLFML1  | ↑↑ | ↑↑ | -  | -  | ↓  | -  |
| PAM     | ↑↑ | ↑↑ | -  | -  | ↓  | ↑  |
| RPLP0P2 | ↑↑ | ↓↓ | -  | -  | -  | -  |
| SLC9A7  | ↑↑ | ↓↓ | -  | -  | ↓↓ | ↑  |
| STOM    | ↑↑ | ↑↑ | ↑↑ | -  | ↑↑ | ↑  |
| TAGLN2  | ↓↓ | ↑↑ | -  | -  | ↑  | -  |
| TM4SF1  | ↑↑ | ↑↑ | -  | ↑↑ | -  | ↑  |
| TMEM140 | ↑↑ | ↑↑ | ↑↑ | ↑  | -  | ↑↑ |
| TPP1    | ↑↑ | ↑↑ | -  | -  | ↓  | -  |

↑↑:  $\log_2$  (Fold change) > 1;

↑:  $0.5 \leq \log_2$  (Fold change)  $\leq 1$ ;

-: No significant change;

↓↓:  $\log_2$  (Fold change) < -1;

↓:  $-1 \leq \log_2$  (Fold change)  $\leq -0.5$ .

Table S2. Consistently regulated genes between KSHV-PDLSC vs. PDLSC and MEndT hAMSC vs. hAMSC

| Function Cluster |                     | Gene symbol | KSHV-MSC vs. MSC | MEndT hAMSC vs. hAMSC | KS vs. Skin | Function Cluster | Gene symbol | KSHV-MSC vs. MSC | MEndT hAMSC vs. hAMSC | KS vs. Skin |
|------------------|---------------------|-------------|------------------|-----------------------|-------------|------------------|-------------|------------------|-----------------------|-------------|
| Differentiation  | Endothelial related | ANGPTL1     | ↑↑               | ↑↑                    | ↑           | Immune response  | BTN3A1      | ↑↑               | ↑↑                    | ↑↑          |
|                  |                     | EDNRA       | ↑↑               | ↑↑                    | ↑↑          |                  | BTN3A3      | ↑↑               | ↑↑                    | ↑↑          |
|                  |                     | FGF5        | ↑↑               | ↑↑                    | ↑           |                  | CD55        | ↓↓               | ↓↓                    | ↓↓          |
|                  |                     | FGF7        | ↑↑               | ↑↑                    | ↑           |                  | C1R         | ↑↑               | ↑↑                    | —           |
|                  |                     | PDPN        | ↑↑               | ↑↑                    | ↑↑          |                  | C1S         | ↑↑               | ↑↑                    | —           |
|                  |                     | PROX1       | ↑↑               | ↑↑                    | ↑↑          |                  | CFH         | ↑↑               | ↑↑                    | ↑↑          |
|                  |                     | TGFB3       | ↑↑               | ↑↑                    | ↑↑          |                  | COTL1       | ↓↓               | ↓↓                    | ↑↑          |
|                  |                     | PTGS2       | ↑↑               | ↑↑                    | ↑           |                  | EPHA3       | ↑↑               | ↑↑                    | ↑↑          |
|                  |                     | SLC40A1     | ↑↑               | ↑↑                    | —           |                  | IFI44       | ↑↑               | ↑↑                    | ↑           |
|                  |                     | SRPX2       | ↑↑               | ↑↑                    | ↑           |                  | IFI44L      | ↑↑               | ↑↑                    | ↑↑          |
|                  | WARS                | ↑↑          | ↑↑               | ↑↑                    | IFITM1      |                  | ↑↑          | ↑↑               | ↑↑                    |             |
|                  | Mesenchymal related | ACTA2       | ↓↓               | ↓↓                    | ↓↓          |                  | IFITM3      | ↑↑               | ↑↑                    | ↑↑          |
|                  |                     | CMKLR1      | ↑↑               | ↑↑                    | —           |                  | IGDCC4      | ↑↑               | ↑↑                    | —           |
|                  |                     | CNN1        | ↓↓               | ↓↓                    | ↓↓          |                  | PSMB8       | ↑↑               | ↑↑                    | ↑           |
|                  |                     | DACT1       | ↓↓               | ↓↓                    | ↓           |                  | SAMHD1      | ↑↑               | ↑↑                    | ↑↑          |
|                  |                     | DDIT3       | ↓↓               | ↓↓                    | ↓           |                  | TAPBPL      | ↑↑               | ↑↑                    | ↑           |
|                  |                     | EFEMP1      | ↑↑               | ↑↑                    | ↓↓          |                  | TLR3        | ↑↑               | ↑↑                    | —           |
|                  |                     | EGFL6       | ↑↑               | ↑↑                    | ↓↓          |                  | TNFAIP3     | ↑↑               | ↑↑                    | —           |
|                  |                     | ETV1        | ↑↑               | ↑↑                    | ↑           |                  | TNFAIP6     | ↑↑               | ↑↑                    | ↓           |
|                  |                     | NBEA        | ↓↓               | ↓↓                    | ↓↓          |                  | TNFRSF10D   | ↓↓               | ↓↓                    | ↓↓          |
| SVIL             |                     | ↑↑          | ↑↑               | ↓↓                    | ACSL4       | ↓↓               | ↓↓          | —                |                       |             |
| TAGLN            | ↓↓                  | ↓↓          | ↓                | APOD                  | ↑↑          | ↑↑               | ↑           |                  |                       |             |
| TPM1             | ↓↓                  | ↓↓          | ↓↓               | APOE                  | ↑↑          | ↑↑               | ↑           |                  |                       |             |

|                                         |          |    |    |        |           |         |         |    |    |   |
|-----------------------------------------|----------|----|----|--------|-----------|---------|---------|----|----|---|
| Other genes involved in differentiation | ADAMTSL4 | ↑↑ | ↑↑ | —      | Metabolic | APOL1   | ↑↑      | ↑↑ | ↑↑ |   |
|                                         | CRABP2   | ↑↑ | ↑↑ | ↓↓     |           | CHST7   | ↑↑      | ↑↑ | ↑↑ |   |
|                                         | DCN      | ↑↑ | ↑↑ | ↓      |           | ENO1    | ↓↓      | ↓↓ | ↓  |   |
|                                         | DIAPH3   | ↓↓ | ↓↓ | ↓↓     |           | PDK4    | ↑↑      | ↑↑ | —  |   |
|                                         | IGF1     | ↑↑ | ↑↑ | ↑↑     |           | PLA2G4A | ↑↑      | ↑↑ | ↓↓ |   |
|                                         | OXTR     | ↓↓ | ↓↓ | ↓↓     |           | PTGIS   | ↓↓      | ↓↓ | ↓↓ |   |
|                                         | TSHZ2    | ↑↑ | ↑↑ | —      |           | SMOX    | ↑↑      | ↑↑ | ↑  |   |
|                                         | TXNIP    | ↑↑ | ↑↑ | ↓↓     |           | TCN2    | ↑↑      | ↑↑ | —  |   |
| Signal transduction                     | AKAP12   | ↑↑ | ↑↑ | ↑↑     |           | Others  | COL21A1 | ↑↑ | ↑↑ | — |
|                                         | ARHGAP20 | ↑↑ | ↑↑ | —      |           |         | CORO2B  | ↑↑ | ↑↑ | ↓ |
|                                         | BST2     | ↑↑ | ↑↑ | ↑↑     | CPA4      |         | ↓↓      | ↓↓ | ↓↓ |   |
|                                         | CHI3L1   | ↑↑ | ↑↑ | ↓↓     | GADD45A   |         | ↓↓      | ↓↓ | ↓  |   |
|                                         | CHI3L2   | ↑↑ | ↑↑ | ↓↓     | KCNJ2     |         | ↑↑      | ↑↑ | —  |   |
|                                         | FAM129A  | ↓↓ | ↓↓ | ↑↑     | MAMDC2    |         | ↑↑      | ↑↑ | —  |   |
|                                         | FAM180A  | ↑↑ | ↑↑ | —      | MME       |         | ↑↑      | ↑↑ | ↓  |   |
|                                         | FIBIN    | ↑↑ | ↑↑ | —      | PARP14    |         | ↑↑      | ↑↑ | —  |   |
|                                         | FOS      | ↑↑ | ↑↑ | ↑↑     | PLAT      |         | ↑↑      | ↑↑ | ↑  |   |
|                                         | F10      | ↑↑ | ↑↑ | ↓↓     | SDK1      |         | ↑↑      | ↑↑ | —  |   |
|                                         | GGH      | ↓↓ | ↓↓ | ↓      | SLC1A3    |         | ↑↑      | ↑↑ | ↓  |   |
|                                         | HSPA4L   | ↑↑ | ↓↓ | ↓↓     | SLC38A4   |         | ↓↓      | ↓↓ | ↓  |   |
|                                         | PCDHB14  | ↑↑ | ↑↑ | —      | SPON1     |         | ↑↑      | ↑↑ | ↑  |   |
|                                         | PMEPA1   | ↓↓ | ↓↓ | ↑↑     | STOM      |         | ↑↑      | ↑↑ | ↑↑ |   |
|                                         |          |    |    | TRANK1 | ↑↑        | ↑↑      | —       |    |    |   |

↑↑:  $\log_2$  (Fold change) > 1;

↑:  $0.5 \leq \log_2$  (Fold change)  $\leq 1$ ;

—: No significant change;

↓↓:  $\log_2$  (Fold change) < -1;

↓:  $-1 \leq \log_2$  (Fold change)  $\leq -0.5$ .

DEGs present both in KSHV-infected MSC and KS signature were marked as red.

Table S3. Common DEGs in KSHV-HDMEC vs. HDMEC and KS signature

| Function Cluster                      |                                                  | Gene symbol | KSHV-<br>HDMEC vs.<br>HDMEC | KSHV-<br>HMVEC vs.<br>HMVEC | KSHV-<br>LEC vs.<br>LEC | KSHV<br>-BEC vs.<br>BEC | KS vs.<br>skin | KSHV-<br>MSC vs.<br>MSC |
|---------------------------------------|--------------------------------------------------|-------------|-----------------------------|-----------------------------|-------------------------|-------------------------|----------------|-------------------------|
| Endothelial-mesenchymal<br>transition |                                                  | COL15A1     | ↑↑                          | ↑↑                          | —                       | ↑                       | ↑↑             | —                       |
|                                       |                                                  | COL5A1      | ↓↓                          | ↓                           | —                       | ↓                       | ↑↑             | ↓                       |
|                                       |                                                  | EZR         | ↓↓                          | —                           | —                       | ↓                       | ↓↓             | ↓                       |
|                                       |                                                  | LMO2        | ↑↑                          | —                           | —                       | —                       | ↑↑             | —                       |
|                                       |                                                  | S100A4      | ↓↓                          | —                           | —                       | ↑                       | ↑↑             | —                       |
|                                       |                                                  | SEMA3C      | ↓↓                          | ↓↓                          | ↓↓                      | —                       | ↓↓             | ↑                       |
|                                       |                                                  | TGFA        | ↑↑                          | ↓                           | ↓                       | —                       | ↓↓             | —                       |
| Vessel development                    |                                                  | ADORA2B     | ↓↓                          | —                           | ↓↓                      | ↓↓                      | ↓↓             | —                       |
|                                       |                                                  | ANGPT2      | ↑↑                          | ↑↑                          | ↑↑                      | ↑                       | ↑↑             | ↑                       |
|                                       |                                                  | FGFR2       | ↓↓                          | —                           | ↑                       | ↑↑                      | ↓↓             | —                       |
|                                       |                                                  | LYVE1       | ↑↑                          | ↑↑                          | —                       | —                       | ↑↑             | —                       |
|                                       |                                                  | PGF1        | ↓                           | ↑                           | ↓                       | —                       | ↑↑             | ↑↑                      |
| Immune<br>response                    | Chemotaxis                                       | STAT1       | ↑↑                          | —                           | —                       | —                       | ↑↑             | ↑↑                      |
|                                       | Inflammation                                     | A2M         | ↑↑                          | ↑↑                          | —                       | ↑↑                      | ↑↑             | —                       |
|                                       |                                                  | MGLL        | ↓↓                          | —                           | —                       | ↓                       | ↑↑             | —                       |
|                                       | Other genes<br>involved in<br>immune<br>response | CBLB        | ↑↑                          | —                           | —                       | ↑↑                      | ↑↑             | —                       |
|                                       |                                                  | GBP1        | ↑↑                          | ↑↑                          | —                       | ↓↓                      | ↑↑             | ↑↑                      |
|                                       |                                                  | GIMAP5      | ↑↑                          | —                           | —                       | ↑                       | ↑↑             | —                       |
|                                       |                                                  | HLX         | ↑↑                          | ↑↑                          | ↑↑                      | ↑↑                      | ↑↑             | —                       |
|                                       |                                                  | MICAL2      | ↓↓                          | ↓                           | —                       | ↓                       | ↑↑             | ↓                       |
|                                       |                                                  | NOD2        | ↑↑                          | —                           | —                       | —                       | ↓↓             | ↑↑                      |
|                                       |                                                  | PTGER4      | ↓↓                          | —                           | —                       | ↓↓                      | ↑↑             | —                       |
| TNFSF10                               | ↑↑                                               | —           | ↓↓                          | —                           | ↑↑                      | ↑↑                      |                |                         |
| Cell proliferation                    |                                                  | KLF4        | ↓↓                          | ↓                           | ↓                       | —                       | ↓↓             | ↑↑                      |
|                                       |                                                  | MYCN        | ↑↑                          | —                           | ↓                       | —                       | ↓↓             | —                       |
|                                       |                                                  | TBX5        | ↓↓                          | —                           | —                       | —                       | ↓↓             | —                       |
| Metabolism                            |                                                  | CD36        | ↑↑                          | ↓                           | ↓↓                      | ↑                       | ↑↑             | ↑↑                      |
|                                       |                                                  | EFS         | ↑↑                          | —                           | —                       | —                       | ↓↓             | —                       |
|                                       |                                                  | EGFR        | ↓↓                          | ↓↓                          | ↓                       | ↓                       | ↓↓             | ↑                       |
|                                       |                                                  | EPS8        | ↓↓                          | —                           | —                       | —                       | ↑↑             | —                       |
|                                       |                                                  | GPSM2       | ↓↓                          | ↓                           | —                       | —                       | ↓↓             | ↓↓                      |



|                      |            |    |    |    |    |    |    |
|----------------------|------------|----|----|----|----|----|----|
|                      | RAB38      | ↓↓ | —  | —  | ↓  | ↓↓ | —  |
|                      | RASGRP3    | ↑↑ | ↑↑ | —  | ↑↑ | ↑↑ | ↑  |
|                      | RGS4       | ↓↓ | ↓↓ | ↓↓ | ↓↓ | ↑↑ | ↑  |
|                      | RIPK4      | ↓↓ | —  | —  | ↓  | ↓↓ | —  |
|                      | STK32B     | ↓↓ | ↑  | —  | ↓  | ↑↑ | —  |
| <b>Metabolism</b>    | BTRC       | ↑↑ | —  | —  | ↑↑ | ↓↓ | —  |
|                      | CSGALNACT1 | ↑↑ | —  | —  | —  | ↑↑ | ↑↑ |
|                      | MAOA       | ↑↑ | ↓  | ↑  | ↓↓ | ↓↓ | —  |
|                      | TIMP3      | ↑↑ | —  | ↓↓ | —  | ↑↑ | ↑↑ |
| <b>Cell adhesion</b> | CLCA2      | ↓↓ | —  | ↑  | ↑  | ↓↓ | ↑↑ |
|                      | COL6A3     | ↓↓ | —  | —  | —  | ↑↑ | —  |
|                      | MPZL2      | ↓↓ | ↑  | —  | ↓  | ↓↓ | —  |
|                      | VCAN       | ↓↓ | —  | ↓  | ↓  | ↑↑ | ↑  |
| <b>Cytoskeleton</b>  | ANK3       | ↓↓ | —  | ↓  | —  | ↓↓ | —  |
|                      | EPB41L3    | ↓↓ | ↓  | —  | —  | ↑↑ | ↑  |
|                      | KIF1A      | ↑↑ | —  | ↑↑ | —  | ↓↓ | —  |
|                      | SEMA6A     | ↑↑ | —  | ↑  | —  | ↑↑ | —  |
| <b>Others</b>        | AKR1B1     | ↓↓ | —  | —  | —  | ↑↑ | ↑↑ |
|                      | ASTN2      | ↑↑ | —  | ↑  | ↑  | ↓↓ | —  |
|                      | BDH1       | ↓↓ | —  | —  | ↑↑ | ↓↓ | —  |
|                      | BIN1       | ↓↓ | ↓  | ↓  | —  | ↑↑ | —  |
|                      | CD200      | ↑↑ | —  | —  | —  | ↑↑ | —  |
|                      | COPS8      | ↓↓ | —  | —  | —  | ↑↑ | —  |
|                      | ELOVL6     | ↓↓ | —  | ↑  | ↑  | ↓↓ | —  |
|                      | ETV5       | ↓↓ | ↑  | —  | ↓  | ↓↓ | ↑  |
|                      | GABBR2     | ↓↓ | ↓  | ↓  | ↓  | ↑↑ | ↑↑ |
|                      | GAD2       | ↓↓ | —  | —  | ↑  | ↓↓ | —  |
|                      | GPR37      | ↓↓ | —  | —  | ↓  | ↓↓ | —  |
|                      | HPCAL1     | ↓↓ | —  | ↑  | —  | ↑↑ | —  |
|                      | IRX5       | ↓↓ | —  | —  | —  | ↓↓ | —  |
|                      | KCNJ13     | ↑↑ | —  | —  | —  | ↓↓ | —  |
|                      | KIAA1045   | ↑↑ | —  | —  | ↓  | ↓↓ | —  |
|                      | KLK11      | ↓↓ | —  | —  | —  | ↓↓ | —  |
|                      | LIMD1      | ↓↓ | —  | ↓  | —  | ↓↓ | —  |
|                      | NAGA       | ↓↓ | —  | —  | ↑  | ↑↑ | —  |

|         |     |    |    |    |     |    |
|---------|-----|----|----|----|-----|----|
| NES     | ↓↓↓ | —  | —  | —  | ↑↑  | ↓  |
| OLFM1   | ↑↑  | —  | —  | ↑  | ↑↑  | —  |
| RAMP2   | ↑↑  | —  | —  | ↑↑ | ↑↑  | —  |
| RAMP3   | ↑↑  | ↓  | ↓  | —  | ↑↑  | —  |
| REEP1   | ↑↑  | —  | ↓  | —  | ↑↑  | —  |
| RTEL1   | ↓↓↓ | —  | —  | ↓  | ↑↑  | —  |
| SEPP1   | ↑↑  | —  | ↓  | —  | ↑↑  | ↑↑ |
| SEP6    | ↑↑  | —  | —  | —  | ↑↑  | —  |
| SLC15A1 | ↓↓↓ | —  | —  | ↑  | ↓↓↓ | —  |
| STOM    | ↑↑  | —  | ↑↑ | ↑  | ↑↑  | ↑↑ |
| TMEM140 | ↑↑  | ↑↑ | —  | ↑↑ | ↑↑  | ↑↑ |
| ZNF185  | ↓↓↓ | —  | —  | —  | ↓↓↓ | ↓  |

↑↑:  $\log_2$  (Fold change) > 1;

↑:  $0.5 \leq \log_2$  (Fold change)  $\leq 1$ ;

—: No significant change;

↓↓:  $\log_2$  (Fold change) < -1;

↓:  $-1 \leq \log_2$  (Fold change)  $\leq -0.5$ .

Table S4. Common DEGs in KSHV-HMVEC vs. HMVEC and KS signature

| Function Cluster                   | Gene symbol                             | KSHV-<br>HDMEC vs.<br>HDMEC | KSHV-<br>HMVEC vs.<br>HMVEC | KSHV-<br>LEC vs.<br>LEC | KSHV-<br>BEC vs.<br>BEC | KS vs.<br>skin | KSHV-<br>MSC vs.<br>MSC |    |
|------------------------------------|-----------------------------------------|-----------------------------|-----------------------------|-------------------------|-------------------------|----------------|-------------------------|----|
| Endothelial-mesenchymal transition | COL15A1                                 | ↑↑                          | ↑↑                          | —                       | ↑                       | ↑↑             | —                       |    |
|                                    | GJA4                                    | ↑                           | ↓↓                          | ↓↓                      | —                       | ↑↑             | —                       |    |
|                                    | HEY1                                    | ↑                           | ↓↓                          | —                       | ↑↑                      | ↑↑             | —                       |    |
|                                    | NRP1                                    | —                           | ↑↑                          | ↑↑                      | —                       | ↑↑             | ↑                       |    |
|                                    | SEMA3C                                  | ↓↓                          | ↓↓                          | ↓↓                      | —                       | ↓↓             | ↑                       |    |
| Vessel development                 | ANGPT2                                  | ↑↑                          | ↑↑                          | ↑↑                      | ↑                       | ↑↑             | ↑                       |    |
|                                    | ANGPTL2                                 | —                           | ↑↑                          | ↓                       | ↑↑                      | ↑↑             | ↑↑                      |    |
|                                    | LYVE1                                   | ↑↑                          | ↑↑                          | —                       | —                       | ↑↑             | —                       |    |
|                                    | PGF1                                    | ↓                           | ↑↑                          | ↓                       | —                       | ↑↑             | ↑↑                      |    |
|                                    | PTPRM                                   | —                           | ↑↑                          | —                       | —                       | ↑↑             | —                       |    |
| Immune Response                    | Chemotaxis                              | CXCL10                      | —                           | ↑↑                      | —                       | —              | ↑↑                      | ↑↑ |
|                                    |                                         | CXCR4                       | ↓                           | ↑↑                      | —                       | —              | ↑↑                      | —  |
|                                    |                                         | GRK5                        | —                           | ↑↑                      | —                       | ↑              | ↑↑                      | ↑  |
|                                    | Inflammation                            | A2M                         | ↑↑                          | ↑↑                      | —                       | ↑↑             | ↑↑                      | —  |
|                                    |                                         | FN1                         | —                           | ↓↓                      | ↓↓                      | ↓              | ↑↑                      | ↑↑ |
|                                    |                                         | IFI16                       | —                           | ↑↑                      | ↑                       | —              | ↑↑                      | ↑↑ |
|                                    |                                         | TLR2                        | ↑                           | ↑↑                      | —                       | —              | ↑↑                      | ↑  |
|                                    | Other genes involved in immune response | GBP1                        | ↑↑                          | ↑↑                      | —                       | ↓↓             | ↑↑                      | ↑↑ |
|                                    |                                         | HLX                         | ↑↑                          | ↑↑                      | ↑↑                      | ↑↑             | ↑↑                      | —  |
|                                    |                                         | HOXB7                       | —                           | ↑↑                      | ↑↑                      | —              | ↑↑                      | —  |
|                                    |                                         | IFI35                       | —                           | ↑↑                      | —                       | —              | ↑↑                      | ↑↑ |
|                                    |                                         | IFITM1                      | —                           | ↑↑                      | ↑                       | —              | ↑↑                      | ↑↑ |
|                                    |                                         | ISG15                       | —                           | ↑↑                      | ↑↑                      | ↑              | ↑↑                      | ↑↑ |
|                                    |                                         | PSMB9                       | ↑                           | ↑↑                      | ↑                       | ↑              | ↑↑                      | ↑↑ |
| SP110                              | —                                       | ↑↑                          | —                           | ↓                       | ↑↑                      | ↑              |                         |    |
| Cell proliferation                 | HYAL1                                   | —                           | ↓↓                          | ↓                       | —                       | ↓↓             | —                       |    |
| Signal transduction                | EGFR                                    | ↓↓                          | ↓↓                          | ↓                       | ↓                       | ↓↓             | ↑                       |    |
|                                    | GUCY1A3                                 | —                           | ↓↓                          | ↓                       | —                       | ↑↑             | —                       |    |
|                                    | LGALS9                                  | —                           | ↑↑                          | —                       | —                       | ↑↑             | ↑↑                      |    |
|                                    | RASGRP3                                 | ↑↑                          | ↑↑                          | —                       | ↑↑                      | ↑↑             | ↑                       |    |
|                                    | RGS4                                    | ↓↓                          | ↓↓                          | ↓↓                      | ↓↓                      | ↑↑             | ↑                       |    |

|                      |         |   |    |    |    |    |    |
|----------------------|---------|---|----|----|----|----|----|
|                      | TRIB2   | — | ↓↓ | ↓  | —  | ↑↑ | —  |
| <b>Metabolism</b>    | NR2F1   | — | ↓↓ | ↓  | ↓↓ | ↑↑ | —  |
|                      | PCSK6   | ↑ | ↑↑ | —  | ↑↑ | ↑↑ | —  |
|                      | UBE2L6  | — | ↑↑ | ↓  | —  | ↑↑ | ↑↑ |
|                      | PCDH12  | — | ↑↑ | —  | —  | ↑↑ | —  |
| <b>Cell adhesion</b> | PCDH17  | ↑ | ↑↑ | ↓  | —  | ↑↑ | ↑↑ |
|                      | DIAPH2  | — | ↑↑ | ↑↑ | ↑  | ↑↑ | —  |
| <b>Cytoskeleton</b>  | CA2     | ↓ | ↑↑ | ↑↑ | ↑↑ | ↓↓ | —  |
| <b>Others</b>        | HSPA4L  | — | ↑↑ | —  | —  | ↓↓ | ↑↑ |
|                      | LXN     | — | ↑↑ | —  | —  | ↑↑ | ↓  |
|                      | PPAP2C  | — | ↓↓ | —  | ↑  | ↓↓ | —  |
|                      | TACSTD2 | — | ↓↓ | ↑  | ↑  | ↓↓ | —  |
|                      | TM4SF1  | — | ↑↑ | —  | ↑  | ↑↑ | ↑↑ |
|                      | ZNF117  | — | ↑↑ | —  | —  | ↓↓ | —  |

↑↑:  $\log_2$  (Fold change) > 1;

↑:  $0.5 \leq \log_2$  (Fold change)  $\leq 1$ ;

—: No significant change;

↓↓:  $\log_2$  (Fold change) < -1;

↓:  $-1 \leq \log_2$  (Fold change)  $\leq -0.5$ .

Table S5. Common DEGs in KSHV-LEC vs. LEC and KS signature

| Function Cluster                          | Gene symbol  | KSHV-<br>HDMEC vs.<br>HDMEC | KSHV-<br>HMVEC vs.<br>HMVEC | KSHV-<br>LEC vs.<br>LEC | KSHV-<br>BEC vs.<br>BEC | KS vs.<br>skin | KSHV-<br>MSC vs.<br>MSC |
|-------------------------------------------|--------------|-----------------------------|-----------------------------|-------------------------|-------------------------|----------------|-------------------------|
| <b>Endothelial-mesenchymal transition</b> | GJA4         | ↑                           | ↓↓                          | ↓↓                      | —                       | ↑↑             | —                       |
|                                           | NRP1         | —                           | ↑↑                          | ↑↑                      | —                       | ↑↑             | ↑                       |
|                                           | SEMA3C       | ↓↓                          | ↓↓                          | ↓↓                      | —                       | ↓↓             | ↑                       |
|                                           | TGFB1I1      | —                           | —                           | ↓↓                      | ↓                       | ↑↑             | ↓                       |
| <b>Vessel development</b>                 | ADORA2B      | ↓↓                          | —                           | ↓↓                      | ↓↓                      | ↓↓             | —                       |
|                                           | ANGPT2       | ↑↑                          | ↑↑                          | ↑↑                      | ↑                       | ↑↑             | ↑                       |
|                                           | LOC100131909 | —                           | —                           | ↓↓                      | ↓↓                      | ↓↓             | —                       |
| <b>Immune response</b>                    | AZGP1        | —                           | —                           | ↑↑                      | ↑                       | ↓↓             | —                       |
|                                           | AZGP1P1      | —                           | —                           | ↑↑                      | ↑                       | ↓↓             | —                       |
|                                           | CBLB         | ↑↑                          | —                           | ↑↑                      | ↑↑                      | ↑↑             | —                       |
|                                           | CD47         | ↑                           | —                           | ↑↑                      | —                       | ↑↑             | ↑                       |
|                                           | GCH1         | —                           | ↑                           | ↑↑                      | —                       | ↑↑             | ↑↑                      |
|                                           | HLX          | ↑↑                          | ↑↑                          | ↑↑                      | ↑↑                      | ↑↑             | —                       |
|                                           | HOXB7        | —                           | ↑↑                          | ↑↑                      | —                       | ↑↑             | —                       |
|                                           | ISG15        | —                           | ↑↑                          | ↑↑                      | ↑                       | ↑↑             | ↑↑                      |
|                                           | TIMP1        | —                           | —                           | ↑↑                      | ↑↑                      | ↑↑             | ↑↑                      |
| <b>Cell proliferation</b>                 | CCND1        | —                           | —                           | ↑↑                      | ↑↑                      | ↓↓             | ↑↑                      |
|                                           | DERL2        | —                           | —                           | ↑↑                      | —                       | ↑↑             | —                       |
|                                           | SSR1         | —                           | —                           | ↑↑                      | —                       | ↑↑             | —                       |
| <b>Signal transduction</b>                | ARL4C        | ↓                           | ↓                           | ↓↓                      | ↓                       | ↑↑             | —                       |
|                                           | ATP6V0E1     | —                           | —                           | ↑↑                      | ↑                       | ↑↑             | ↑                       |
|                                           | DGKD         | —                           | —                           | ↑↑                      | ↑                       | ↑↑             | —                       |
|                                           | ECE1         | —                           | —                           | ↑↑                      | —                       | ↑↑             | ↑                       |
|                                           | FLNA         | —                           | —                           | ↑↑                      | ↓                       | ↑↑             | ↓                       |
|                                           | IQGAP2       | —                           | —                           | ↓↓                      | —                       | ↑↑             | —                       |
|                                           | JAK1         | —                           | ↑                           | ↑↑                      | ↑                       | ↑↑             | —                       |
|                                           | RGS4         | ↓↓                          | ↓↓                          | ↓↓                      | ↓↓                      | ↑↑             | ↑                       |
| <b>Metabolism</b>                         | B3GAT3       | —                           | —                           | ↑↑                      | —                       | ↑↑             | ↑                       |
|                                           | CST3         | —                           | —                           | ↑↑                      | ↑                       | ↑↑             | ↑                       |
|                                           | IMPA2        | —                           | —                           | ↓↓                      | —                       | ↓↓             | ↑                       |
|                                           | ITGB3        | ↑                           | ↑                           | ↑↑                      | ↑                       | ↑↑             | —                       |
|                                           | UBE2J1       | —                           | —                           | ↑↑                      | ↑↑                      | ↑↑             | —                       |

|                      |           |    |    |    |    |    |    |
|----------------------|-----------|----|----|----|----|----|----|
| <b>Cell adhesion</b> | LOXL2     | —  | —  | ↑↑ | ↓↓ | ↑↑ | ↓  |
|                      | NID1      | ↑  | —  | ↓↓ | —  | ↑↑ | —  |
|                      | PODXL     | ↓  | ↑  | ↑↑ | ↑↑ | ↑↑ | ↑↑ |
| <b>Cytoskeleton</b>  | DIAPH2    | —  | ↑↑ | ↑↑ | ↑  | ↑↑ | —  |
|                      | KIF1A     | ↑↑ | —  | ↑↑ | —  | ↓↓ | —  |
| <b>Others</b>        | C21ORF7   | —  | —  | ↑↑ | ↑↑ | ↑↑ | —  |
|                      | CA2       | ↓  | ↑↑ | ↑↑ | ↑↑ | ↓↓ | —  |
|                      | CNNM2     | —  | —  | ↑↑ | —  | ↓↓ | ↑  |
|                      | GOLM1     | —  | —  | ↑↑ | —  | ↑↑ | ↑↑ |
|                      | GPR116    | —  | —  | ↑↑ | ↑  | ↑↑ | —  |
|                      | HEG1      | —  | —  | ↓↓ | ↑  | ↑↑ | —  |
|                      | IGSF3     | —  | —  | ↓↓ | ↑  | ↓↓ | —  |
|                      | KCNIP1    | —  | —  | ↓↓ | —  | ↓↓ | —  |
|                      | KIAA1462  | —  | —  | ↓↓ | —  | ↑↑ | ↑  |
|                      | LOC283398 | —  | —  | ↑↑ | —  | ↓↓ | —  |
|                      | NCR2      | —  | —  | ↑↑ | ↓  | ↓↓ | —  |
|                      | PLLP      | —  | ↓  | ↓↓ | —  | ↓↓ | —  |
|                      | PLVAP     | —  | —  | ↑↑ | ↑↑ | ↑↑ | —  |
|                      | RNF115    | —  | —  | ↑↑ | ↑  | ↑↑ | —  |
|                      | SLC39A14  | —  | —  | ↑↑ | —  | ↑↑ | —  |
|                      | SNX10     | —  | —  | ↓↓ | —  | ↑↑ | —  |
|                      | STOM      | ↑↑ | —  | ↑↑ | ↑  | ↑↑ | ↑↑ |
|                      | SUCLG2    | ↓  | —  | ↑↑ | —  | ↓↓ | —  |
|                      | TBCD      | —  | —  | ↑↑ | —  | ↑↑ | —  |
|                      | TFPI      | —  | ↓  | ↓↓ | ↓  | ↑↑ | ↑  |
| THSD7A               | ↑         | —  | ↓↓ | —  | ↑↑ | —  |    |
| XPNPEP1              | —         | —  | ↓↓ | —  | ↑↑ | —  |    |

↑↑:  $\log_2$  (Fold change) > 1;

↑:  $0.5 \leq \log_2$  (Fold change)  $\leq 1$ ;

—: No significant change;

↓↓:  $\log_2$  (Fold change) < -1;

↓:  $-1 \leq \log_2$  (Fold change)  $\leq -0.5$ .

Table S6. Common DEGs in KSHV-BEC vs. BEC and KS signature

| Function Cluster    |                                         | Gene symbol  | KSHV-<br>HDMEC vs.<br>HDMEC | KSHV-<br>HMVEC vs.<br>HMVEC | KSHV-<br>LEC vs.<br>LEC | KSHV-<br>BEC vs.<br>BEC | KS vs.<br>skin | KSHV-<br>MSC vs.<br>MSC |
|---------------------|-----------------------------------------|--------------|-----------------------------|-----------------------------|-------------------------|-------------------------|----------------|-------------------------|
| Vessel development  |                                         | ADORA2B      | ↓↓                          | —                           | ↓↓                      | ↓↓                      | ↓↓             | —                       |
|                     |                                         | ANGPTL2      | —                           | ↑                           | ↓                       | ↑↑                      | ↑↑             | ↑↑                      |
|                     |                                         | FGFR2        | ↓↓                          | —                           | ↑                       | ↑↑                      | ↓↓             | —                       |
|                     |                                         | HEY1         | ↑                           | ↓↓                          | —                       | ↑↑                      | ↑↑             | —                       |
|                     |                                         | LOC100131909 | —                           | —                           | ↓↓                      | ↓↓                      | ↓↓             | —                       |
|                     |                                         | VCAM1        | —                           | —                           | —                       | ↓↓                      | ↑↑             | ↑↑                      |
| Immune Response     | Chemotaxis                              | CCL5         | —                           | —                           | ↑                       | ↑↑                      | ↑↑             | ↑↑                      |
|                     |                                         | CYBA         | —                           | —                           | —                       | ↑↑                      | ↑↑             | ↑                       |
|                     | Inflammation                            | A2M          | ↑↑                          | ↑↑                          | —                       | ↑↑                      | ↑↑             | —                       |
|                     |                                         | TNFRSF4      | —                           | ↓                           | ↓                       | ↑↑                      | ↑↑             | —                       |
|                     | Other genes involved in immune response | CBLB         | ↑↑                          | —                           | —                       | ↑↑                      | ↑↑             | —                       |
|                     |                                         | GBP1         | ↑↑                          | ↑↑                          | —                       | ↓↓                      | ↑↑             | ↑↑                      |
|                     |                                         | HLX          | ↑↑                          | ↑↑                          | ↑↑                      | ↑↑                      | ↑↑             | —                       |
|                     |                                         | ISG20        | —                           | —                           | —                       | ↓↓                      | ↑↑             | ↑↑                      |
|                     |                                         | PTGER4       | ↓↓                          | —                           | —                       | ↓↓                      | ↑↑             | —                       |
|                     |                                         | TACC3        | ↓                           | ↓                           | —                       | ↓↓                      | ↑↑             | ↓↓                      |
| TAPBP               | —                                       | —            | —                           | ↑↑                          | ↑↑                      | ↑                       |                |                         |
| TIMP1               | —                                       | —            | ↑↑                          | ↑↑                          | ↑↑                      | ↑↑                      |                |                         |
| Cell proliferation  |                                         | CCND1        | —                           | —                           | ↑↑                      | ↑↑                      | ↓↓             | ↑↑                      |
| Signal transduction |                                         | APP          | —                           | —                           | —                       | ↑↑                      | ↑↑             | ↑                       |
|                     |                                         | CCDC88A      | ↓                           | —                           | —                       | ↑↑                      | ↑↑             | —                       |
|                     |                                         | HPGD         | —                           | —                           | —                       | ↓↓                      | ↓↓             | —                       |
|                     |                                         | RASGRP3      | ↑↑                          | ↑↑                          | —                       | ↑↑                      | ↑↑             | ↑                       |
|                     |                                         | RGS4         | ↓↓                          | ↓↓                          | ↓↓                      | ↓↓                      | ↑↑             | ↑                       |
|                     |                                         | SIK1         | —                           | —                           | ↑                       | ↓↓                      | ↓↓             | —                       |
|                     | SPRY1                                   | ↑            | ↑                           | ↓                           | ↑↑                      | ↑↑                      | ↑              |                         |
| Metabolism          |                                         | BTRC         | ↑↑                          | —                           | —                       | ↑↑                      | ↓↓             | —                       |
|                     |                                         | MAOA         | ↑↑                          | ↓                           | ↑                       | ↓↓                      | ↓↓             | —                       |
|                     |                                         | MEF2C        | —                           | ↑                           | —                       | ↑↑                      | ↑↑             | —                       |
|                     |                                         | MGAT2        | ↓                           | —                           | —                       | ↑↑                      | ↑↑             | —                       |
|                     |                                         | NR2F1        | —                           | ↓↓                          | ↓                       | ↓↓                      | ↑↑             | —                       |

|                      |          |    |    |    |    |    |    |
|----------------------|----------|----|----|----|----|----|----|
|                      | PBXIP1   | —  | —  | ↓  | ↑↑ | ↑↑ | ↑↑ |
|                      | PCSK6    | ↑  | ↑↑ | —  | ↑↑ | ↑↑ | —  |
|                      | PTPRN2   | —  | —  | ↓  | ↑↑ | ↑↑ | ↑  |
|                      | UBE2J1   | —  | —  | ↑↑ | ↑↑ | ↑↑ | —  |
| <b>Cell adhesion</b> | COL6A1   | —  | ↑  | ↑  | ↑↑ | ↑↑ | ↑  |
|                      | LOXL2    | —  | —  | ↑↑ | ↓↓ | ↑↑ | ↓  |
|                      | PARVB    | —  | —  | ↓  | ↓↓ | ↑↑ | ↓  |
|                      | PCDHGA12 | —  | —  | —  | ↑↑ | ↑↑ | —  |
|                      | PCDHGC3  | —  | —  | —  | ↑↑ | ↑↑ | —  |
|                      | PCDHGC4  | —  | —  | —  | ↑↑ | ↑↑ | —  |
|                      | PCDHGC5  | —  | —  | —  | ↑↑ | ↑↑ | ↑  |
|                      | PODXL    | ↓  | ↑  | ↑↑ | ↑↑ | ↑↑ | ↑↑ |
|                      | ZYX      | —  | ↓  | —  | ↓↓ | ↑↑ | —  |
| <b>Others</b>        | ALDH3A1  | —  | —  | ↑  | ↑↑ | ↓↓ | ↑↑ |
|                      | ASPA     | —  | —  | —  | ↑↑ | ↓↓ | ↑  |
|                      | BDH1     | ↓↓ | —  | —  | ↑↑ | ↓↓ | —  |
|                      | C21ORF7  | —  | —  | ↑↑ | ↑↑ | ↑↑ | —  |
|                      | CA2      | ↓  | ↑↑ | ↑↑ | ↑↑ | ↓↓ | —  |
|                      | CYB5R2   | —  | —  | —  | ↑↑ | ↓↓ | —  |
|                      | CYP3A43  | —  | —  | ↑  | ↓↓ | ↓↓ | —  |
|                      | GOLGA8A  | —  | —  | —  | ↑↑ | ↓↓ | ↑  |
|                      | GOLGA8B  | —  | —  | —  | ↑↑ | ↓↓ | —  |
|                      | GPR126   | —  | ↓  | —  | ↓↓ | ↓↓ | —  |
|                      | HIP1R    | —  | —  | —  | ↓↓ | ↓↓ | —  |
|                      | LZTS1    | —  | —  | ↑  | ↑↑ | ↓↓ | —  |
|                      | METRN    | ↓  | —  | —  | ↑↑ | ↑↑ | ↑  |
|                      | MTERF    | —  | —  | —  | ↓↓ | ↓↓ | —  |
|                      | NOL3     | —  | —  | ↑  | ↑↑ | ↓↓ | —  |
|                      | PLVAP    | —  | —  | ↑↑ | ↑↑ | ↑↑ | —  |
|                      | RAMP2    | ↑↑ | —  | —  | ↑↑ | ↑↑ | —  |
|                      | RTN1     | —  | —  | —  | ↑↑ | ↑↑ | —  |
|                      | SDPR     | —  | —  | —  | ↓↓ | ↑↑ | ↑  |
|                      | SEP6     | ↑↑ | —  | —  | ↑↑ | ↑↑ | —  |
|                      | SLC38A7  | —  | —  | ↓  | ↑↑ | ↑↑ | —  |
|                      | TLL2     | —  | —  | —  | ↓↓ | ↓↓ | —  |
| TMEM140              | —        | ↑↑ | —  | ↑↑ | ↑↑ | ↑↑ |    |



|  |         |   |   |   |    |    |   |
|--|---------|---|---|---|----|----|---|
|  | TMEM204 | — | — | — | ↑↑ | ↑↑ | — |
|  | TTC39A  | — | — | — | ↓↓ | ↓↓ | — |

↑↑:  $\log_2$  (Fold change) > 1;

↑:  $0.5 \leq \log_2$  (Fold change)  $\leq 1$ ;

—: No significant change;

↓↓:  $\log_2$  (Fold change) < -1;

↓:  $-1 \leq \log_2$  (Fold change)  $\leq -0.5$ .
